# Supplementary material for: Associations Between Using Chinese Herbal Medicine and Long-Term Outcome Among Pre-dialysis Diabetic Nephropathy Patients: A Retrospective Population-Based Cohort Study
Source: Front Pharmacol. 2021 Feb 18;12:616522. doi: 10.3389/fphar.2021.616522 (PMC7930622; doi:10.3389/fphar.2021.616522)
Supplement: Supplementary file 3 [file table3.xlsx]

## Sheet: 工作表1
Name of herbal formula	composition	percentage(w/W%)
Ji-Sheng-Shen-Qi-Wan	Rehmannia glutinosa (Gaertn.) DC.	0.235294
	Cornus officinalis Siebold & Zucc.	0.117647
	Dioscorea oppositifolia L.	0.117647
	Poria cocos (Schw.) Wolf	0.176471
	Paeonia × suffruticosa Andrews	0.0882353
	Alisma plantago-aquatica L. or Alisma plantago-aquatica subsp. orientale (Sam.) Sam..	0.0882353
	Aconitum carmichaeli Debeaux	0.0294118
	Cinnamomum cassia (L.) J.Presl	0.0294118
	Achyranthes bidentata Blume	0.0588235
	Plantago asiatica L. or Plantago depressa Willd.	0.0588235
Zhu-Ling-Tang	Polyporus umbellatus (Pers.) Fr.	0.222222
	Poria cocos (Schw.) Wolf	0.222222
	Alisma plantago-aquatica L. or Alisma plantago-aquatica subsp. orientale (Sam.) Sam..	0.222222
	Pulvis Talci	0.222222
	Equus asinus L.	0.111111
Wu-Lin-San	Poria cocos (Schw.) Wolf	0.2
	Polyporus umbellatus (Pers.) Fr.	0.2
	Atractylodes macrocephala Koidz.	0.2
	Alisma plantago-aquatica L. or Alisma plantago-aquatica subsp. orientale (Sam.) Sam..	0.266667
	Cinnamomum cassia (L.) J.Presl	0.133333
Zhi-Gan-Cao-Tang	Glycyrrhiza uralensis Fisch. ex DC.	0.0952381
	Zingiber officinale Roscoe	0.0793651
	Cinnamomum cassia (L.) J.Presl	0.0793651
	Panax ginseng C.A.Mey.	0.047619
	Rehmannia glutinosa (Gaertn.) DC.	0.380952
	Ophiopogon japonicus (Thunb.) Ker Gawl.	0.0793651
	Cannabis sativa L.	0.0952381
	Zizyphus jujuba Mill.	0.0952381
	Equus asinus L.	0.047619
Tian-Ma-Gou-Teng-Yin	Gastrodia elata Blume	0.0491803
	Uncaria rhynchophylla (Miq.) Miq. or Uncaria macrophylla Wall. or Uncaria hirsuta Havil. or Uncaria sinensis (Oliv.) Havil. or Uncaria sessilifructus Roxb.	0.0819672
	Haliotis diversicolor Reeve.	0.163934
	Gardenia jasminoides Ellis.	0.0491803
	Scutellaria baicalensis Georgi	0.0491803
	Eucommia ulmoides Oliv.	0.0819672
	Taxillus chinensis (DC.) Danser	0.131148
	Leonurus heterophyllus Sweet	0.0819672
	Reynoutria multiflora (Thunb.) Moldenke	0.163934
	Achyranthes bidentata Blume	0.0655738
	Poria cocos (Schw.) Wolf	0.0819672
Yang-Xin-Tang	Astragalus mongholicus Bunge or Astragalus membranaceus (Fisch.) Bge.	0.0909091
	Poria cocos (Schw.) Wolf	0.0909091
	Poria cocos (Schw.) Wolf	0.0909091
	Pinellia ternata (Thunb.) Makino	0.0909091
	Angelica sinensis (Oliv.) Diels	0.0909091
	Conioselinum anthriscoides 'Chuanxiong'	0.0909091
	Polygala tenuifolia Willd. or Polygala sibirica L.	0.0606061
	Ziziphus jujuba Mill.	0.0606061
	Cinnamomum cassia (L.) J.Presl	0.0606061
	Platycladus orientalis (L.) Franco.	0.0606061
	Schisandra chinensis (Turcz.) Baill.	0.0606061
	Panax ginseng C.A.Mey.	0.0606061
	Glycyrrhiza uralensis Fisch. ex DC.	0.030303
	Zingiber officinale Roscoe	0.030303
	Zizyphus jujuba Mill.	0.030303
Shen-Zhao-Tang	Poria cocos (Schw.) Wolf	0.333333
	Zingiber officinale Roscoe	0.333333
	Atractylodes macrocephala Koidz.	0.166667
	Glycyrrhiza uralensis Fisch. ex DC.	0.166667
Li-Zhong-Tang	Atractylodes macrocephala Koidz.	0.266667
	Panax ginseng C.A.Mey.	0.266667
	Glycyrrhiza uralensis Fisch. ex DC.	0.266667
	Zingiber officinale Roscoe	0.2
Ma-Zi-Ren-Wan	Cannabis sativa L.	0.242424
	Paeonia lactiflora Pall.	0.121212
	Citrus × aurantium L.	0.121212
	Magnolia officinalis Rehder & E.H.Wilson or Magnolia officinalis var. biloba Rehder & E.H.Wilson.	0.121212
	Prunus armeniaca L.	0.151515
	Rheum palmatum L. or Rheum tanguticum (Maxim. ex Regel) Balf. or Rheum officinale Baill.	0.242424
Qing-Xin-Lian-Zi-Yin	Sinocrassula indica (Decne.) A. Berger	0.136364
	Poria cocos (Schw.) Wolf	0.136364
	Astragalus mongholicus Bunge or Astragalus membranaceus (Fisch.) Bge.	0.136364
	Panax ginseng C.A.Mey.	0.136364
	Ophiopogon japonicus (Thunb.) Ker Gawl.	0.0909091
	Lycium chinense Mill. or Lycium barbarum L.	0.0909091
	Scutellaria baicalensis Georgi	0.0909091
	Glycyrrhiza uralensis Fisch. ex DC.	0.0909091
	Plantago asiatica L. or Plantago depressa Willd.	0.0909091
Ba-Zheng-San	Plantago asiatica L. or Plantago depressa Willd.	0.115385
	Dianthus superbus L. or Dianthus chinensis L.	0.115385
	Pulvis Talci	0.115385
	Rheum palmatum L. or Rheum tanguticum (Maxim. ex Regel) Balf. or Rheum officinale Baill.	0.115385
	Gardenia jasminoides Ellis.	0.115385
	Polygonum aviculare L.	0.115385
	Clematis armandii Franch. or Clematis montana Buch.-Ham. ex DC.	0.115385
	Glycyrrhiza uralensis Fisch. ex DC.	0.115385
	Juncus effusus L.	0.0769231
Xue-Fu-Zhu-Yu-Tang	Angelica sinensis (Oliv.) Diels	0.119681
	Rehmannia glutinosa (Gaertn.) DC.	0.119681
	Prunus persica (L.) Batsch or Prunus davidiana (Carr.) Franch.	0.159574
	Carthamus tinctorius L.	0.119681
	Citrus aurantium L.	0.0797872
	Paeonia lactiflora Pall. or Peaonia veitchii Lynch	0.0797872
	Bupleurum chinense DC.	0.0398936
	Glycyrrhiza uralensis Fisch. ex DC.	0.0398936
	Platycodon grandiflorus (Jacq.) A.DC.	0.0611702
	Conioselinum anthriscoides 'Chuanxiong'	0.0611702
	Achyranthes bidentata Blume	0.119681
Zhi-Bai-Di-Huang-Wan	Rehmannia glutinosa (Gaertn.) DC.	0.275862
	Cornus officinalis Siebold & Zucc.	0.137931
	Poria cocos (Schw.) Wolf	0.103448
	Dioscorea oppositifolia L.	0.137931
	Paeonia × suffruticosa Andrews	0.103448
	Alisma plantago-aquatica L. or Alisma plantago-aquatica subsp. orientale (Sam.) Sam..	0.103448
	Anemarrhena asphodeloides Bunge	0.0689655
	Phellodendron chinense C.K.Schneid. or Phellodendron amurense Rupr.	0.0689655
Bei-Xie-Fen-Qing-Yin	Alpinia oxyphylla Miq.	0.2
	Dioscorea septemloba Thunb. or Dioscorea collettii var. hypoglauca (Palib.) S.J.Pei & C.T.Ting	0.2
	Acorus calamus var. angustatus Besser	0.2
	Lindera aggregata (Sims) Kosterm.	0.2
	Glycyrrhiza uralensis Fisch. ex DC.	0.1
	Poria cocos (Schw.) Wolf	0.1
Sheng-Mai-San	Panax ginseng C.A.Mey.	0.4
	Ophiopogon japonicus (Thunb.) Ker Gawl.	0.4
	Schisandra chinensis (Turcz.) Baill.	0.2
Yin-Chen-Wu-Ling-San	Artemisia scoparia Waldst. et Kit. or Artemisia capillaris Thunb.	0.666667
	Alisma plantago-aquatica L. or Alisma plantago-aquatica subsp. orientale (Sam.) Sam..	0.104167
	Polyporus umbellatus (Pers.) Fr.	0.0625
	Poria cocos (Schw.) Wolf	0.0625
	Atractylodes macrocephala Koidz.	0.0625
	Cinnamomum cassia (L.) J.Presl	0.0416667
Zhi-Zhuo-Gu-Ben-Wan	Nelumbo nucifera Gaertn	0.137931
	Coptis chinensis Franch. or Coptis deltoidea C.Y.Cheng & P.K.Hsiao or Coptis teeta Wall.	0.137931
	Poria cocos (Schw.) Wolf	0.0689655
	Amomum villosum Lour. or Amomum villosum var. xanthioides (Wall. ex Baker) T.L.Wu & S.J.Chen or Amomum longiligulare T.L. Wu	0.0689655
	Alpinia oxyphylla Miq.	0.0689655
	Pinellia ternata (Thunb.) Makino	0.0689655
	Phellodendron chinense C.K.Schneid. or Phellodendron amurense Rupr.	0.0689655
	Glycyrrhiza uralensis Fisch. ex DC.	0.206897
	Polyporus umbellatus (Pers.) Fr.	0.172414
Bu-Zhong-Yi-Qi-Tang	Astragalus mongholicus Bunge or Astragalus membranaceus (Fisch.) Bge.	0.222222
	Panax ginseng C.A.Mey.	0.148148
	Atractylodes macrocephala Koidz.	0.0740741
	Glycyrrhiza uralensis Fisch. ex DC.	0.148148
	Angelica sinensis (Oliv.) Diels	0.0740741
	Citrus reticulata Blanco	0.0740741
	Cimicifuga heracleifolia Kom. or Cimicifuga dahurica (Turcz.) Maxim. or Cimicifuga foetida L.	0.037037
	Bupleurum chinense DC.	0.037037
	Zingiber officinale Roscoe	0.111111
	Zizyphus jujuba Mill.	0.0740741
Qi-Ju-Di-Huang-Wan	Lycium barbarum L. or Lycium chinense Mill.	0.0689655
	Chrysanthemum morifolium Ramat.	0.0689655
	Rehmannia glutinosa (Gaertn.) DC.	0.275862
	Cornus officinalis Siebold & Zucc.	0.137931
	Dioscorea oppositifolia L.	0.137931
	Poria cocos (Schw.) Wolf	0.103448
	Paeonia × suffruticosa Andrews	0.103448
	Alisma plantago-aquatica L. or Alisma plantago-aquatica subsp. orientale (Sam.) Sam..	0.103448
Tian-Wang-Bu-Xin-Dan	Rehmannia glutinosa (Gaertn.) DC.	0.0714286
	Panax ginseng C.A.Mey.	0.0714286
	Polygala tenuifolia Willd. or Polygala sibirica L.	0.0714286
	Acorus calamus var. angustatus Besser	0.0714286
	Scrophularia ningpoensis Hemsl.	0.0714286
	Platycladus orientalis (L.) Franco.	0.0714286
	Platycodon grandiflorus (Jacq.) A.DC.	0.0714286
	Asparagus cochinchinensis (Lour.) Merr.	0.0714286
	Salvia miltiorrhiza Bunge	0.0714286
	Ziziphus jujuba Mill.	0.0714286
	Ophiopogon japonicus (Thunb.) Ker Gawl.	0.0714286
	Poria cocos (Schw.) Wolf	0.0714286
	Angelica sinensis (Oliv.) Diels	0.0714286
	Schisandra chinensis (Turcz.) Baill.	0.0714286
Jia-Wei-Xiao-Yao-San	Angelica sinensis (Oliv.) Diels	0.121212
	Atractylodes macrocephala Koidz.	0.121212
	Paeonia lactiflora Pall.	0.121212
	Bupleurum chinense DC.	0.121212
	Poria cocos (Schw.) Wolf	0.121212
	Glycyrrhiza uralensis Fisch. ex DC.	0.0606061
	Paeonia × suffruticosa Andrews	0.0757576
	Gardenia jasminoides Ellis.	0.0757576
	Zingiber officinale Roscoe	0.121212
	Mentha canadensis L.	0.0606061
Bu-Yang-Huan-Wu-Tang	Astragalus mongholicus Bunge or Astragalus membranaceus (Fisch.) Bge.	0.833333
	Angelica sinensis (Oliv.) Diels	0.0416667
	Paeonia lactiflora Pall. or Peaonia veitchii Lynch	0.0416667
	Pheretima aspergillum (perrier) or Allolobophora caliginosa frapezoides (Duges)	0.0208333
	Conioselinum anthriscoides 'Chuanxiong'	0.0208333
	Prunus persica (L.) Batsch or Prunus davidiana (Carr.) Franch.	0.0208333
	Carthamus tinctorius L.	0.0208333
